# Supplementary material for: Carbon dot-functionalized macroporous adsorption resin for bifunctional ultra-sensitive detection and fast removal of iron(iii) ions
Source: Royal Society of Chemistry journal article supplement (doi:10.1039/d2ay01366e), 2022-01-01
Supplement: d2ay01366e1.pdf [file d2ay01366e1.pdf]

## Supplementary Material

# **Carbon dots functionalized macroporous adsorption resin for bifunctional ultra-sensitive detection and fast removal of iron(III) ions**

Chao Huang<sup>1</sup>, Hongwei Wang<sup>1</sup>, Yunjia Xu<sup>1</sup>, Shujuan Ma<sup>2</sup>, Bolin Gong<sup>1\*</sup>, Junjie Ou<sup>1,2,3\*</sup>

<sup>1</sup>School of Chemistry and Chemical Engineering, Key Laboratory for Chemical Engineering and Technology, State Ethnic Affairs Commission, North Minzu University, Yinchuan 750021, China

<sup>2</sup>CAS Key Laboratory of Separation Science for Analytical Chemistry, Dalian Institute of Chemical Physics, Chinese Academy of Sciences, Dalian 116023, China

<sup>3</sup>University of Chinese Academy of Sciences, Beijing 100049, China

\* To whom correspondence should be addressed:

**Prof. Bolin Gong**

Tel: +86-951-2067917

Fax: +86-951-2067917

Email address: gongbolin@163.com (B. Gong)

**Prof. Junjie Ou**

Tel: +86-411-84379576

Fax: +86-411-84379620

Email address: junjieou@dicp.ac.cn (J. Ou)

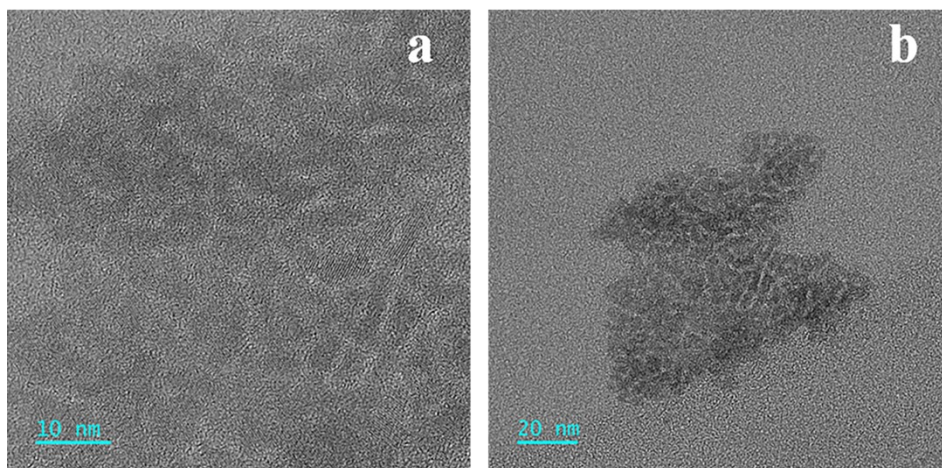

**Fig. S1.** TEM images of CDs with different magnification.

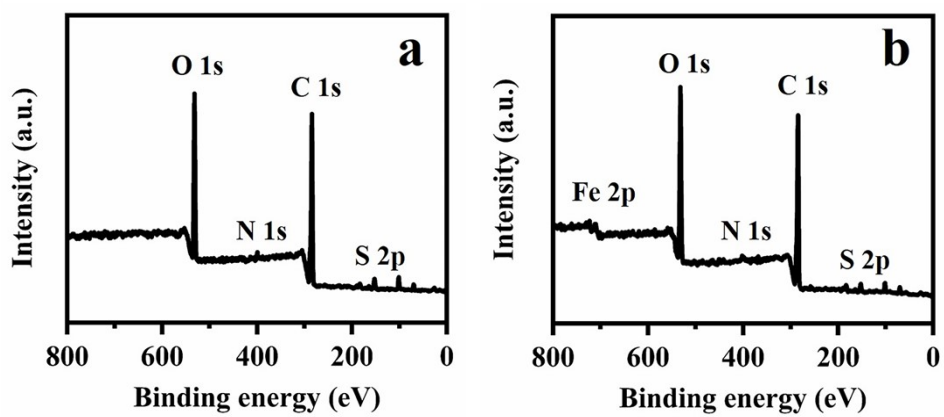

**Fig. S2.** XPS full spectra of MAR@poly(PA)@CD (a) before and (b) after adsorption of Fe<sup>3+</sup>.

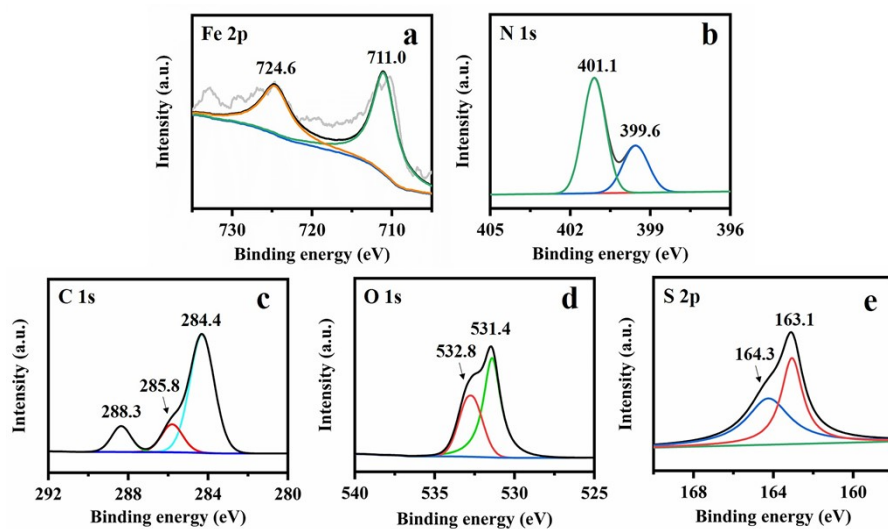

**Fig. S3.** High resolution XPS spectra of (a) Fe 2p, (b) N 1s, (c) C 1s, (d) O 1s and (e) S 2p after adsorption of Fe<sup>3+</sup> of MAR@poly(PA)@CD.

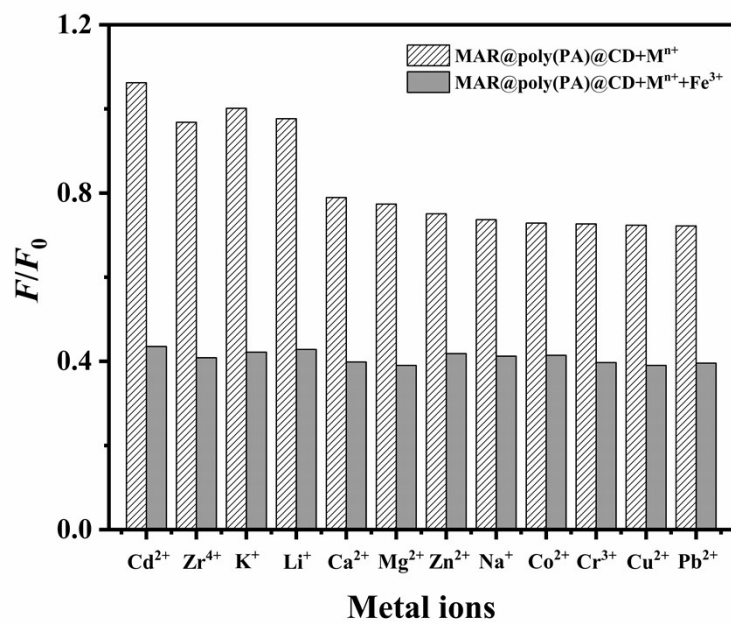

**Fig. S4.** Fluorescence responses of MAR@poly(PA)@CD toward 12 kinds of metal ions in the absence and presence of Fe<sup>3+</sup>.

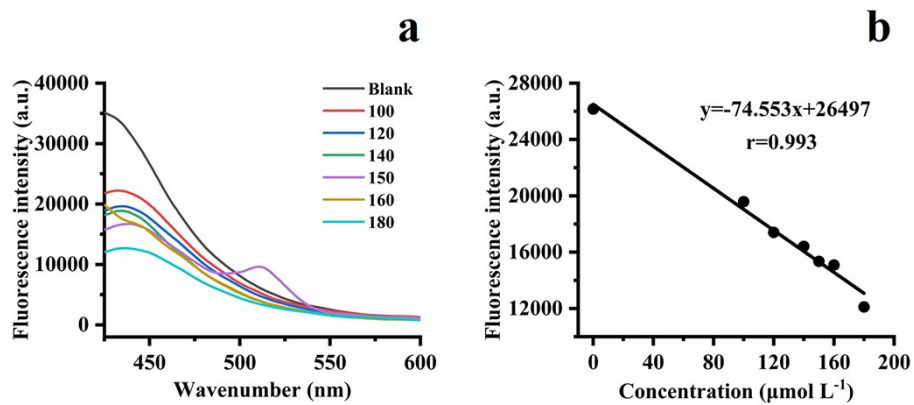

**Fig. S5.** (a) Fluorescence emission spectrum containing different concentrations of  $\text{Fe}^{3+}$ . (b) Linear response curve for detection of  $\text{Fe}^{3+}$  by CDs.

**Table S1** Comparison of specific surface area, pore volume and average pore diameter of poly(GMA-*co*-EDMA) and MAR@poly(PA)@CD.

| Materials                  | Specific surface area<br>(m <sup>2</sup> g <sup>-1</sup> ) | Pore volume<br>(cm <sup>3</sup> g <sup>-1</sup> ) | Average pore diameter<br>(nm) |
|----------------------------|------------------------------------------------------------|---------------------------------------------------|-------------------------------|
| Poly(GMA- <i>co</i> -EDMA) | 33.4                                                       | 0.160                                             | 20.3                          |
| MAR@poly(PA)@CD            | 13.6                                                       | 0.090                                             | 23.6                          |

**Table S2** Isothermal adsorption fitting parameters of MAR@poly(PA)@CD to Fe<sup>3+</sup> by Langmuir and Freundlich models.

| Langmuir isotherm model          |                            |        | Freundlich isotherm model   |        |        |
|----------------------------------|----------------------------|--------|-----------------------------|--------|--------|
| $Q_{\max}$ (mg g <sup>-1</sup> ) | $K_L$ (L g <sup>-1</sup> ) | $r_L$  | $K_F$ (mg g <sup>-1</sup> ) | $1/n$  | $r_F$  |
| 24.15                            | 3.451                      | 0.9992 | 15.71                       | 0.2549 | 0.9398 |



**Table S3** Kinetic adsorption fitting parameters of MAR@poly(PA)@CD to Fe<sup>3+</sup> by pseudo-first-order and pseudo-second-order models.

| $C_0$<br>( $\mu\text{mol L}^{-1}$ ) | $Q_e$<br>( $\text{mg g}^{-1}$ ) | pseudo-first-order             |                                               |        | pseudo-second-order                              |                                               |        |
|-------------------------------------|---------------------------------|--------------------------------|-----------------------------------------------|--------|--------------------------------------------------|-----------------------------------------------|--------|
|                                     |                                 | $k_1$<br>( $\text{min}^{-1}$ ) | $Q_{1 \text{ cal}}$<br>( $\text{mg g}^{-1}$ ) | $r_1$  | $k_2$<br>( $\text{g mg}^{-1} \text{ min}^{-1}$ ) | $Q_{2 \text{ cal}}$<br>( $\text{mg g}^{-1}$ ) | $r_2$  |
| 200.0                               | 20.20                           | 0.0382                         | 8.492                                         | 0.7628 | 0.003658                                         | 22.68                                         | 0.9902 |
